# Supplementary material for: Demographics of road injuries and micromobility injuries among China, India, Japan, and the United States population: evidence from an age-period-cohort analysis
Source: PubMed Central journal article supplement (PMC9011927; doi:10.1186/s12889-022-13152-6), 2022-04-14
Supplement: 12889_2022_13152_MOESM1_ESM.pdf [file 12889_2022_13152_MOESM1_ESM.pdf]

**Table 1. GBD ICD-10 code definition of road injury, motorcyclist injury and cyclist injury**

| Cause                      | ICD10                                           |
|----------------------------|-------------------------------------------------|
| Road injuries              | V01-V04.99, V06-V80.929, V82-V82.9, V87.2-V87.3 |
| Cyclist road injuries      | V10-V19.9                                       |
| Motorcyclist road injuries | V20-V29.9                                       |

**Table 2. The Wald Chi-Square tests for estimable functions in the APC model**

| Null Hypothesis              | China       |         |            |         |                     |         |            |         |                |         |            |         |
|------------------------------|-------------|---------|------------|---------|---------------------|---------|------------|---------|----------------|---------|------------|---------|
|                              | Road Injury |         |            |         | Motorcyclist Injury |         |            |         | Cyclist Injury |         |            |         |
|                              | Deaths      |         | Incidence  |         | Deaths              |         | Incidence  |         | Deaths         |         | Incidence  |         |
|                              | Chi-Square  | P-Value | Chi-Square | P-Value | Chi-Square          | P-Value | Chi-Square | P-Value | Chi-Square     | P-Value | Chi-Square | P-Value |
| NetDrift = 0                 | 416.84      | <0.001  | 2237.11    | <0.001  | 719.42              | <0.001  | 742.07     | <0.001  | 64.75          | <0.001  | 1471.68    | <0.001  |
| All Period RR = 1            | 266.62      | <0.001  | 2645.89    | <0.001  | 282.96              | <0.001  | 1172.5     | <0.001  | 286.93         | <0.001  | 1856.02    | <0.001  |
| All Cohort RR = 1            | 123.35      | <0.001  | 2656.03    | <0.001  | 95.98               | <0.001  | 1194.68    | <0.001  | 103.48         | <0.001  | 2102.88    | <0.001  |
| All Local Drifts = Net Drift | 88.64       | <0.001  | 74.78      | <0.001  | 87.6                | <0.001  | 91.91      | <0.001  | 93.06          | <0.001  | 75.33      | <0.001  |
| India                        |             |         |            |         |                     |         |            |         |                |         |            |         |
| NetDrift = 0                 | 1377.83     | <0.001  | 614.28     | <0.001  | 2785.85             | <0.001  | 777.01     | <0.001  | 537.63         | <0.001  | 793.74     | <0.001  |
| All Period RR = 1            | 93.78       | <0.001  | 123.73     | <0.001  | 159.22              | <0.001  | 258.85     | <0.001  | 109.3          | <0.001  | 127.11     | <0.001  |
| All Cohort RR = 1            | 269.61      | <0.001  | 124.47     | <0.001  | 198.8               | <0.001  | 245.81     | <0.001  | 184.41         | <0.001  | 107.99     | <0.001  |
| All Local Drifts = Net Drift | 219.16      | <0.001  | 57.03      | <0.001  | 102.88              | <0.001  | 47.15      | <0.001  | 131.92         | <0.001  | 65.58      | <0.001  |
| Japan                        |             |         |            |         |                     |         |            |         |                |         |            |         |
| NetDrift = 0                 | 4938.72     | <0.001  | 7731.03    | <0.001  | 1795.51             | <0.001  | 6867.24    | <0.001  | 432.37         | <0.001  | 4526.01    | <0.001  |
| All Period RR = 1            | 5033.86     | <0.001  | 6193.34    | <0.001  | 415.37              | <0.001  | 2459.65    | <0.001  | 477.83         | <0.001  | 4121.57    | <0.001  |
| All Cohort RR = 1            | 6729.51     | <0.001  | 6549.78    | <0.001  | 1804.93             | <0.001  | 3844.71    | <0.001  | 1283.5         | <0.001  | 4670.65    | <0.001  |
| All Local Drifts = Net Drift | 90.6        | <0.001  | 98.87      | <0.001  | 260.96              | <0.001  | 377.21     | <0.001  | 14.61          | 0.48    | 292.92     | <0.001  |
| The US                       |             |         |            |         |                     |         |            |         |                |         |            |         |
| NetDrift = 0                 | 3835        | <0.001  | 1083.11    | <0.001  | 681.55              | <0.001  | 453.45     | <0.001  | 384.63         | <0.001  | 209.88     | <0.001  |
| All Period RR = 1            | 701.68      | <0.001  | 52.54      | <0.001  | 153.06              | <0.001  | 73.87      | <0.001  | 46.71          | <0.001  | 64.21      | <0.001  |
| All Cohort RR = 1            | 1117.27     | <0.001  | 266.59     | <0.001  | 303.45              | <0.001  | 247.34     | <0.001  | 355.33         | <0.001  | 297.82     | <0.001  |
| All Local Drifts = Net Drift | 266.74      | <0.001  | 172.4      | <0.001  | 236.74              | <0.001  | 231.41     | <0.001  | 307.86         | <0.001  | 237.18     | <0.001  |

**Table 3. Overall annual percent change values for road injury, motorcyclist injury, and cyclist injury mortality and incidence in China, India, Japan, and the US**

|                            |                  |              | <b>Net Drift (%/year)</b> | <b>CI Lo</b> | <b>CI Hi</b> |
|----------------------------|------------------|--------------|---------------------------|--------------|--------------|
| <b>Road injury</b>         | <b>Mortality</b> | <b>China</b> | -0.443                    | -0.611       | -0.275       |
|                            |                  | <b>India</b> | -0.433                    | -0.563       | -0.304       |
|                            |                  | <b>Japan</b> | -4.692                    | -4.822       | -4.563       |
|                            |                  | <b>USA</b>   | -1.577                    | -1.696       | -1.457       |
|                            | <b>Incidence</b> | <b>China</b> | 2.480                     | 2.380        | 2.581        |
|                            |                  | <b>India</b> | 1.018                     | 0.726        | 1.312        |
|                            |                  | <b>Japan</b> | -2.485                    | -2.547       | -2.422       |
|                            |                  | <b>USA</b>   | -0.498                    | -0.692       | -0.304       |
| <b>Motorcyclist injury</b> | <b>Mortality</b> | <b>China</b> | 0.144                     | -0.150       | 0.438        |
|                            |                  | <b>India</b> | 0.653                     | 0.466        | 0.840        |
|                            |                  | <b>Japan</b> | -4.285                    | -4.700       | -3.868       |
|                            |                  | <b>USA</b>   | 2.027                     | 1.629        | 2.426        |
|                            | <b>Incidence</b> | <b>China</b> | 3.025                     | 2.847        | 3.204        |
|                            |                  | <b>India</b> | 1.936                     | 1.633        | 2.240        |
|                            |                  | <b>Japan</b> | -2.434                    | -2.532       | -2.337       |
|                            |                  | <b>USA</b>   | 0.956                     | 0.708        | 1.204        |
| <b>Cyclist injury</b>      | <b>Mortality</b> | <b>China</b> | 0.018                     | -0.191       | 0.227        |
|                            |                  | <b>India</b> | -0.583                    | -0.758       | -0.408       |
|                            |                  | <b>Japan</b> | -4.715                    | -5.133       | -4.295       |
|                            |                  | <b>USA</b>   | -0.589                    | -0.903       | -0.274       |
|                            | <b>Incidence</b> | <b>China</b> | 2.550                     | 2.429        | 2.672        |
|                            |                  | <b>India</b> | 0.736                     | 0.399        | 1.074        |
|                            |                  | <b>Japan</b> | -2.257                    | -2.327       | -2.187       |
|                            |                  | <b>USA</b>   | 0.236                     | -0.086       | 0.558        |
